# Supplementary material for: The effect of hydrostatic pressure on model membrane domain composition and lateral compressibility
Source: Royal Society of Chemistry journal article supplement (doi:10.1039/c5cp04239a), 2015-11-16
Supplement: c5cp04239a1.pdf [file c5cp04239a1.pdf]

## The effect of hydrostatic pressure on model membrane domain composition and lateral compressibility

H.M.G. Barriga\*, R. V. Law, J. M. Seddon, O. Ces and N.J. Brooks\*

### Supplementary Information

The peak areas from samples lying along the same tie line were used to determine the 'zero diffraction intensity' composition for each phase (which corresponds to the tie line end points) by linear extrapolation of the normalised composition – peak area data. A custom built automated LabVIEW based programme was used to fit the  $L_o$  and  $L_d$  diffraction peaks simultaneously using double pseudo-Voigt functions. The de-convoluted peaks from each sample were assigned as either  $L_o$  or  $L_d$  based on the samples position along the tie line and the relative peak intensities. The DOPC, DPPC and cholesterol composition was then plotted as a function of the normalised area of each peak. Normalisation of the sum of the  $L_o$  and  $L_d$  peak areas to 1 was performed post-fitting and has been described previously.<sup>1</sup> We have demonstrated this fitting method for samples 2, 3 and 4 at atmospheric pressure and 100 MPa as shown in Figure S1 to calculate the composition of the  $L_o$  phase. The normalised area of the  $L_d$  diffraction peak is plotted as a function of (a) DOPC (b) DPPC (c) cholesterol composition, with a linear fit to this data where:

mol% lipid = (gradient x Peak Area) + y intercept

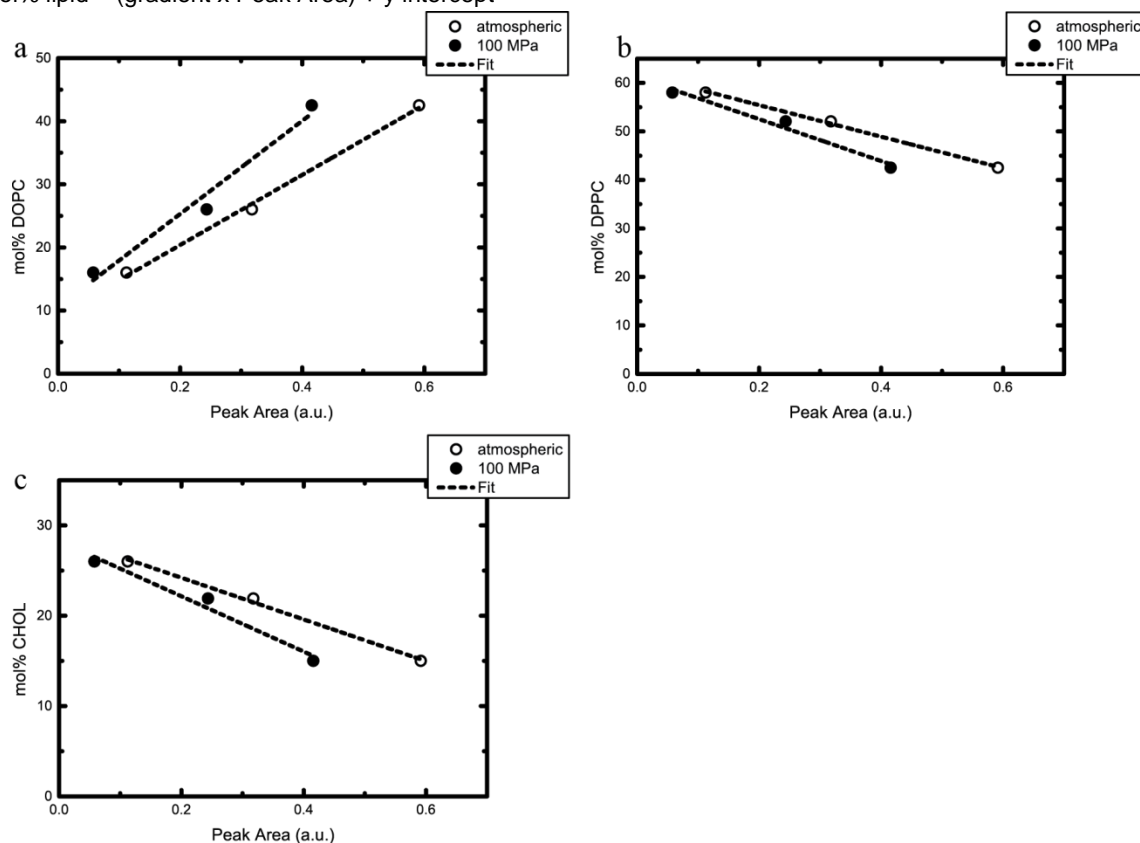

**Figure S1.** Plots of the  $L_d$  peak area used to find the compositions of the  $L_o$  phase (based on the tieline endpoint) for samples 2, 3 and 4.

We note that any changes in layer-to-layer registry due to pressure would lead to an equal reduction in the  $L_o$  and  $L_d$  registration within any given bilayer and is therefore accounted for through the normalisation post-fitting. Therefore, the level of registration or anti-registration would not influence the determination of the tieline endpoints or the assignment of the  $L_o$  and  $L_d$  phases. We also assume that the direction of the tie line does not change significantly with pressure, as discussed previously and supported by the linear relationship of peak area with lipid composition at all pressures.

When the  $L_d$  diffraction peak area is zero, the sample is solely composed of the  $L_o$  phase and hence the mol% of DOPC, DPPC and cholesterol in the  $L_o$  phase can be calculated using the y intercept from the linear fit.

The zero diffraction compositions for  $L_o$  and  $L_d$  were calculated separately to independently determine the two endpoints. For the tie line endpoint calculations only the first order diffraction peaks were used, given their significantly higher intensity than the second order peaks. Results for the tie line endpoint calculations, including the errors in the fits have been shown in Figure S2.

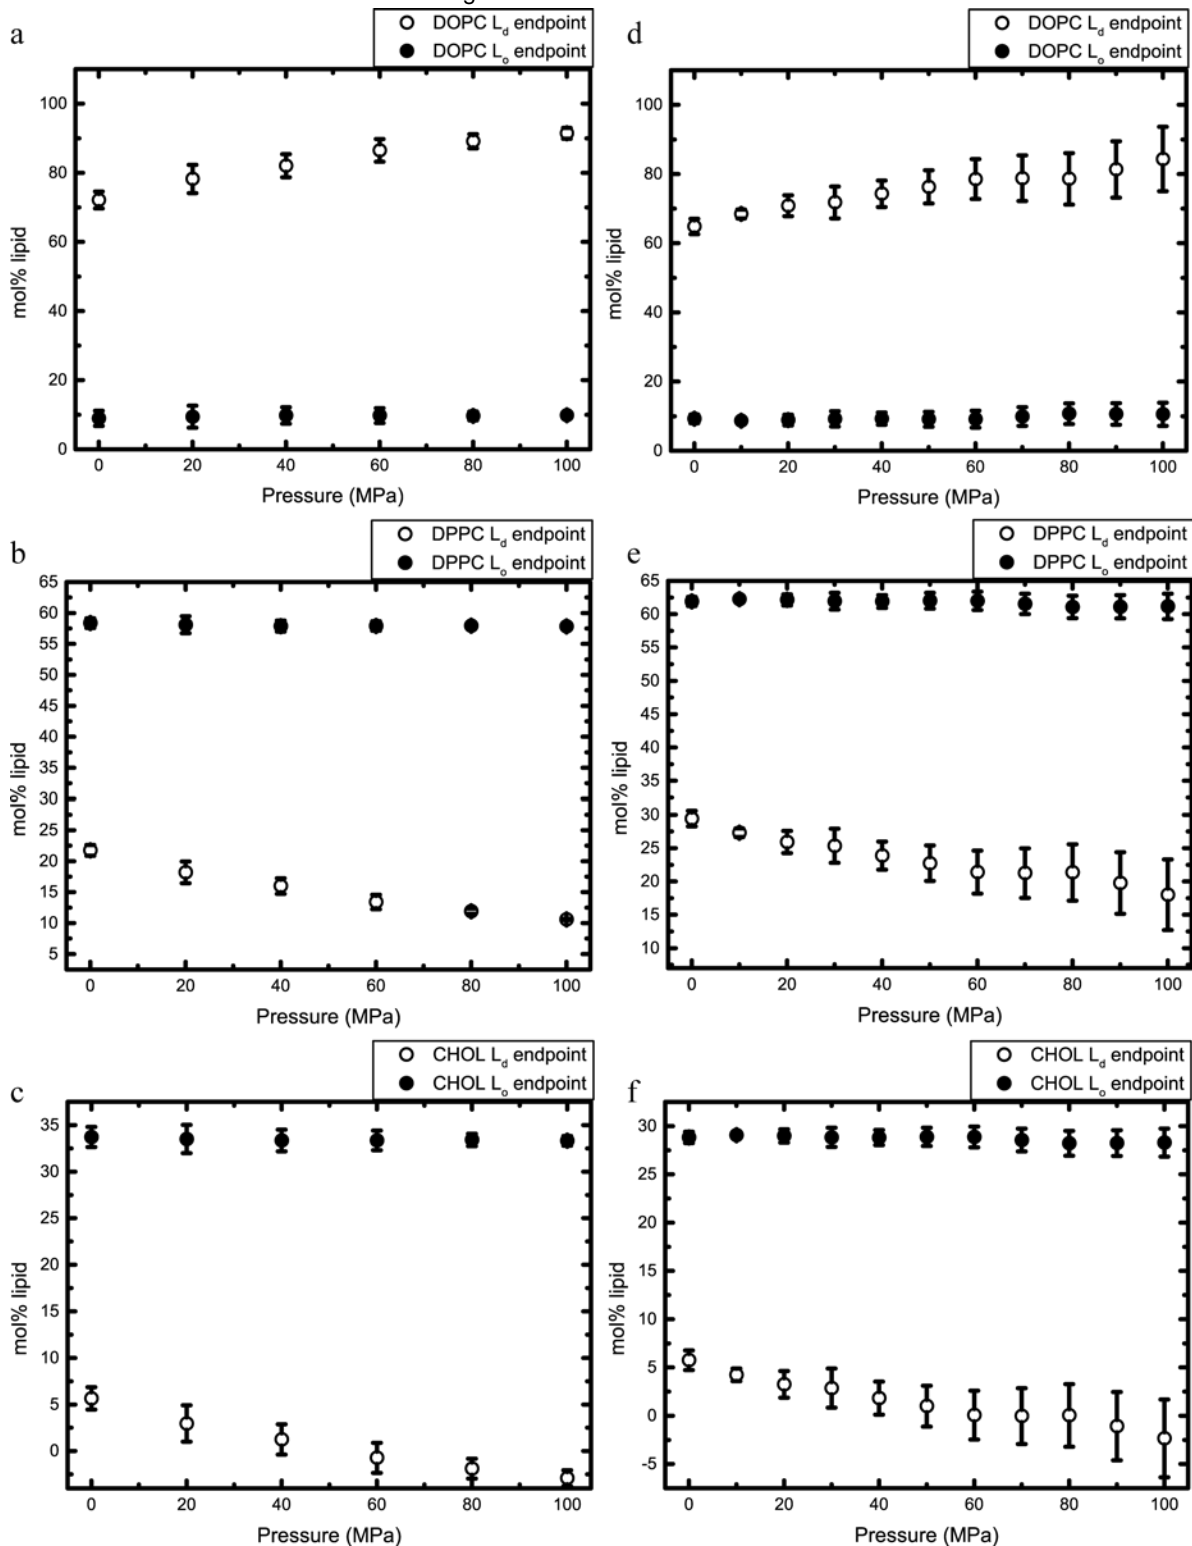

**Figure S2.** Calculated tie line endpoint compositions for samples 5 to 7 showing (a) DOPC (b) DPPC (c) CHOL and samples 1 to 4 showing (d) DOPC (e) DPPC (f) CHOL

1. P. Heftberger, B. Kollmitzer, A. A. Rieder, H. Amenitsch and G. Pabst, *Biophysical Journal*, 2015, **108**, 854-862.
